# Supplementary material for: Ferrocenyl-substituted nitronyl nitroxide in the design of one-dimensional magnets
Source: Royal Society of Chemistry journal article supplement (doi:10.1039/d3dt03858k), 2023-12-19
Supplement: d3dt03858k1.pdf [file d3dt03858k1.pdf]

## ELECTRONIC SUPPLEMENTARY INFORMATION

### Ferrocenyl-substituted nitronyl nitroxide in the design of one-dimensional magnets

Kseniya Maryunina,<sup>\*a,b</sup> Daria Nigomedyanova,<sup>a,b</sup> Vitaly Morozov,<sup>a</sup> Kristina Smirnova,<sup>a,b</sup>  
Gleb Letyagin,<sup>a,b</sup> Galina Romanenko,<sup>a</sup> Nikolay Efimov,<sup>c</sup> Artem Bogomyakov,<sup>\*a,b</sup>  
and Victor Ovcharenko<sup>a</sup>

E-mail: [mks@tomo.nsc.ru](mailto:mks@tomo.nsc.ru) (K.M.), [bus@tomo.nsc.ru](mailto:bus@tomo.nsc.ru) (A.B.)

<sup>a</sup> International Tomography Center, SB RAS, Novosibirsk, Russia

<sup>b</sup> Novosibirsk State University, Novosibirsk, Russia

<sup>c</sup> N.S. Kurnakov Institute of General and Inorganic Chemistry, Russian Academy of Sciences,  
Moscow, Russia

### Content

|                                                                                                                                                         |    |
|---------------------------------------------------------------------------------------------------------------------------------------------------------|----|
| 1. Crystal data and experimental details for complexes .....                                                                                            | 2  |
| 2. Selected bond lengths and angles .....                                                                                                               | 3  |
| 3. Ferrocenyl-substituted nitronyl nitroxide L, their reduced derivatives L*, H <sub>2</sub> L <sup>+</sup> and nitronyl<br>ketone L <sup>d</sup> ..... | 4  |
| 4. Fragments of crystal structures .....                                                                                                                | 4  |
| 5. Crystal structure of binuclear {L[Co(hfac) <sub>2</sub> ] <sub>2</sub> L*} and complex salt H <sub>2</sub> L'[Co(hfac) <sub>3</sub> ] .....          | 6  |
| 6. Comparison of <i>trans</i> - and <i>cis</i> -chains .....                                                                                            | 7  |
| 7. Powder X-ray Diffraction patterns .....                                                                                                              | 8  |
| 8. Magnetic susceptibility measurements .....                                                                                                           | 9  |
| 9. Quantum chemical calculations .....                                                                                                                  | 13 |
| 10. References .....                                                                                                                                    | 13 |

## 1. Crystal data and experimental details for complexes

**Table S1.** Crystal data and experimental details for complexes, where L = (Cp)Fe(CpNN), L\* = (Cp)Fe(CpIN)<sub>0.5</sub>(CpNN)<sub>0.5</sub>, H<sub>2</sub>L<sup>+</sup> = CpFe(CpImOH)<sup>+</sup>

| Compound                                                                                    | [Mn(hfac) <sub>2</sub> L] <sub>n</sub>                                            | [Co(hfac) <sub>2</sub> L] <sub>n</sub>                                            | {L[Co(hfac) <sub>2</sub> ] <sub>2</sub> L*}                                                                    | (H <sub>2</sub> L)[Co(hfac) <sub>3</sub> ]                                        | {[Cu(hfac) <sub>2</sub> ] <sub>3</sub> L <sub>2</sub> }                                                        | [Zn(hfac) <sub>2</sub> L]                                                         | [Zn(hfac) <sub>2</sub> L]·0.25C <sub>6</sub> H <sub>14</sub>                           |
|---------------------------------------------------------------------------------------------|-----------------------------------------------------------------------------------|-----------------------------------------------------------------------------------|----------------------------------------------------------------------------------------------------------------|-----------------------------------------------------------------------------------|----------------------------------------------------------------------------------------------------------------|-----------------------------------------------------------------------------------|----------------------------------------------------------------------------------------|
| Formula                                                                                     | C <sub>27</sub> H <sub>23</sub> F <sub>12</sub> FeMnN <sub>2</sub> O <sub>6</sub> | C <sub>27</sub> H <sub>23</sub> F <sub>12</sub> FeCoN <sub>2</sub> O <sub>6</sub> | C <sub>54</sub> H <sub>46</sub> Co <sub>2</sub> F <sub>24</sub> Fe <sub>2</sub> N <sub>4</sub> O <sub>11</sub> | C <sub>32</sub> H <sub>26</sub> CoF <sub>18</sub> FeN <sub>2</sub> O <sub>7</sub> | C <sub>64</sub> H <sub>48</sub> Cu <sub>3</sub> F <sub>36</sub> Fe <sub>2</sub> N <sub>4</sub> O <sub>16</sub> | C <sub>27</sub> H <sub>23</sub> F <sub>12</sub> FeZnN <sub>2</sub> O <sub>6</sub> | C <sub>28.5</sub> H <sub>26.5</sub> F <sub>12</sub> FeN <sub>2</sub> O <sub>6</sub> Zn |
| FW                                                                                          | 810.26                                                                            | 814.25                                                                            | 1612.51                                                                                                        | 1007.33                                                                           | 2115.38                                                                                                        | 820.69                                                                            | 842.24                                                                                 |
| T, K                                                                                        | 296                                                                               | 296                                                                               | 296                                                                                                            | 296                                                                               | 296                                                                                                            | 296                                                                               | 296                                                                                    |
| Space group, Z                                                                              | <i>P2<sub>1</sub>/n</i> , 4                                                       | <i>P2<sub>1</sub>/n</i> , 4                                                       | <i>Pbcn</i> , 4                                                                                                | <i>P2<sub>1</sub>/c</i> , 4                                                       | <i>P</i> -1, 1                                                                                                 | <i>P</i> -1, 4                                                                    | <i>P</i> -1, 4                                                                         |
| <i>a</i> ,                                                                                  | 14.3528(3)                                                                        | 14.2966(11)                                                                       | 13.6953(13)                                                                                                    | 15.3968(19)                                                                       | 12.2065(12)                                                                                                    | 12.3105(6)                                                                        | 12.2352(11)                                                                            |
| <i>b</i> ,                                                                                  | 15.6852(4)                                                                        | 15.5154(13)                                                                       | 21.185(2)                                                                                                      | 11.6830(10)                                                                       | 12.3811(12)                                                                                                    | 15.4830(8)                                                                        | 15.0010(14)                                                                            |
| <i>c</i> , Å                                                                                | 14.5169(3)                                                                        | 14.4767(12)                                                                       | 21.563(2)                                                                                                      | 22.175(3)                                                                         | 14.0205(13)                                                                                                    | 19.1434(10)                                                                       | 21.498(2)                                                                              |
| $\alpha$ ,                                                                                  |                                                                                   |                                                                                   | 90                                                                                                             | 90                                                                                | 86.613(5)                                                                                                      | 75.379(3)                                                                         | 72.553(4)                                                                              |
| $\beta$ ,                                                                                   | 97.424(2)                                                                         | 96.601(5)                                                                         | 90                                                                                                             | 97.779(9)                                                                         | 71.390(5)                                                                                                      | 87.408(3)                                                                         | 89.059(5)                                                                              |
| $\gamma$ , °                                                                                |                                                                                   |                                                                                   | 90                                                                                                             | 90                                                                                | 83.519(6)                                                                                                      | 69.457(3)                                                                         | 76.936(5)                                                                              |
| <i>V</i> , Å <sup>3</sup>                                                                   | 3240.74(13)                                                                       | 3189.9(5)                                                                         | 6256.2(11)                                                                                                     | 3952.2(7)                                                                         | 1994.7(3)                                                                                                      | 3302.3(3)                                                                         | 3661.1(6)                                                                              |
| <i>D<sub>c</sub></i> , g cm <sup>-3</sup>                                                   | 1.661                                                                             | 1.695                                                                             | 1.713                                                                                                          | 1.693                                                                             | 1.761                                                                                                          | 1.651                                                                             | 1.528                                                                                  |
| $\theta_{\max}$ , deg.                                                                      | 28.296                                                                            | 28.314                                                                            | 67.956                                                                                                         | 25.350                                                                            | 29.602                                                                                                         | 28.723                                                                            | 67.922                                                                                 |
| <i>I</i> <sub>hkl</sub> (meas/uniq) / <i>R</i> <sub>int</sub>                               | 32946 / 7920<br>0.0814                                                            | 31466 / 7926<br>0.1040                                                            | 37249 / 5655 /<br>0.1019                                                                                       | 39717 / 7239 /<br>0.1702                                                          | 38678 / 10991 /<br>0.0550                                                                                      | 56995 / 16786 /<br>0.0760                                                         | 35506 / 12953 /<br>0.0557                                                              |
| <i>GoodF</i>                                                                                | 0.821                                                                             | 0.790                                                                             | 0.932                                                                                                          | 0.661                                                                             | 0.817                                                                                                          | 0.823                                                                             | 1.005                                                                                  |
| <i>I</i> <sub>hkl</sub> ( <i>I</i> >2 $\sigma$ <sub><i>I</i></sub> ) / <i>N<sub>s</sub></i> | 3628 / 523                                                                        | 3054 / 479                                                                        | 4066 / 599                                                                                                     | 2278 / 663                                                                        | 4993 / 715                                                                                                     | 7403 / 1054                                                                       | 7674 / 937                                                                             |
| <i>R</i> <sub>1</sub> / <i>wR</i> <sub>2</sub> ( <i>I</i> >2 $\sigma$ <sub><i>I</i></sub> ) | 0.0443 / 0.0790                                                                   | 0.0502 / 0.0739                                                                   | 0.0408 / 0.0999                                                                                                | 0.0401 / 0.0451                                                                   | 0.0403 / 0.0895                                                                                                | 0.0411 / 0.0885                                                                   | 0.0652 / 0.181                                                                         |
| CCDC                                                                                        | 2298179                                                                           | 2298176                                                                           | 2298180                                                                                                        | 2308668                                                                           | 2298178                                                                                                        | 2298181                                                                           | 2298177                                                                                |

## 2. Selected bond lengths and angles

**Table S2.** Selected bond lengths (Å) and angles (deg) in discussed compounds, where L = (Cp)Fe(CpNN), L\* = (Cp)Fe(CpIN)<sub>0.5</sub>(CpNN)<sub>0.5</sub>, H<sub>2</sub>L<sup>+</sup> = CpFe(CpImOH)<sup>+</sup>

| Compound                                                         | M–O <sub>NO</sub>     | M–O <sub>hfac</sub>   | ∠MO <sub>NO</sub> N   | Fe–C <sub>Cp</sub>    | N–O                   | ∠O <sub>NO</sub> MO <sub>NO</sub> | ∠Cp–NN | ∠hfac–hfac | ∠Cp–hfac | Cp...hfac<br>centroids |      |
|------------------------------------------------------------------|-----------------------|-----------------------|-----------------------|-----------------------|-----------------------|-----------------------------------|--------|------------|----------|------------------------|------|
| [Mn(hfac) <sub>2</sub> L] <sub>n</sub>                           | 2.171(2)–<br>2.176(2) | 2.127(2)–<br>2.156(2) | 135.5(1)–<br>136.5(1) | 1.982(5)–<br>2.045(3) | 1.297(2)–<br>1.292(2) | 164.87(7)                         | 2.2    | 16.3       | –        | –                      |      |
| [Co(hfac) <sub>2</sub> L] <sub>n</sub>                           | 2.123(2)–<br>2.169(2) | 2.034(2)–<br>2.072(2) | 132.5(2)–<br>135.5(2) | 1.977(8)–<br>2.052(4) | 1.296(3)–<br>1.290(3) | 167.31(8)                         | 1.2    | 13.9       | –        | –                      |      |
| {[Cu(hfac) <sub>2</sub> ] <sub>3</sub> L <sub>2</sub> }          | CuO <sub>6</sub>      | 2.666(2)              | 1.915(2)–<br>1.993(2) | 152.4(1)              | 2.009(4)–<br>2.034(4) | 1.267(2)–<br>1.308(2)             | 180.00 | 24.0       | 180      | –                      | –    |
|                                                                  | CuO <sub>5</sub>      | 1.942 (2)             | 2.201(2)              | 120.5(1)              | –                     | –                                 | –      |            | 85.9     | 16.8                   | 3.49 |
| [Zn(hfac) <sub>2</sub> L]                                        | Zn1                   | 1.986(2)              | 1.989(2)–<br>2.071(2) | 117.8(1),             | 2.014(4)–<br>2.055(3) | 1.323(3)–<br>1.264(3)             | –      | 17.7       | 54.5     | 13.5                   | 3.52 |
|                                                                  | Zn2                   | 1.976(2)              | –                     | 118.6(1)              | –                     | 1.320(3)–<br>1.264(3)             |        |            | 28.4     | 53.5                   | 18.1 |
| [Zn(hfac) <sub>2</sub> L]<br>·0.25C <sub>6</sub> H <sub>14</sub> | Zn1                   | 1.969(4)              | 1.987(4)–<br>2.067(4) | 117.8(3),             | 2.013(6)–<br>2.059(6) | 1.334(5)–<br>1.261(6)             | –      | 23.4,      | 49.5     | 17.8                   | 3.67 |
|                                                                  | Zn2                   | 1.981(4)              | –                     | 120.8(3)              | –                     | 1.329(5)–<br>1.269(5)             |        |            | 22.5     | 56.9                   | 21.2 |
| {L[Co(hfac) <sub>2</sub> ] <sub>2</sub> L*}                      | 2.095(2)–<br>2.184(2) | 2.048(2)–<br>2.084(2) | 119.9(1),<br>134.9(1) | 1.98(2)–<br>2.058(4)  | 1.349(2)–<br>1.301(5) | –                                 | 19.1   | 89.1       | –        | –                      |      |
| (H <sub>2</sub> L')[Co(hfac) <sub>3</sub> ]                      | –                     | 2.052(3)–<br>2.081(3) | –                     | 2.004(5)–<br>2.046(5) | 1.368(4)              | –                                 | 11.2   | –          | –        | –                      |      |

3. Ferrocenyl-substituted nitronyl nitroxide L, their reduced derivatives L\*, H<sub>2</sub>L<sup>+</sup> and nitronyl ketone L<sup>d</sup>

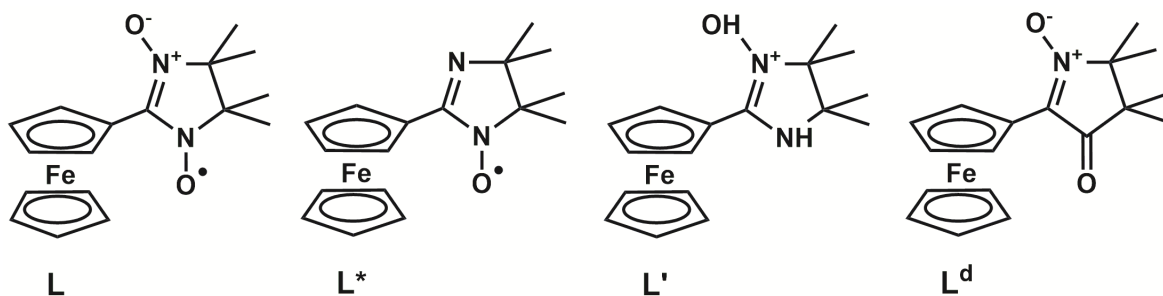

**Scheme S1.** Ferrocenyl-substituted nitronyl nitroxide L, its reduced derivatives imino nitroxide L\* and hydroxy-imidazolium cation H<sub>2</sub>L<sup>+</sup>, and model diamagnetic analog nitronyl ketone L<sup>d</sup>.

4. Fragments of crystal structures

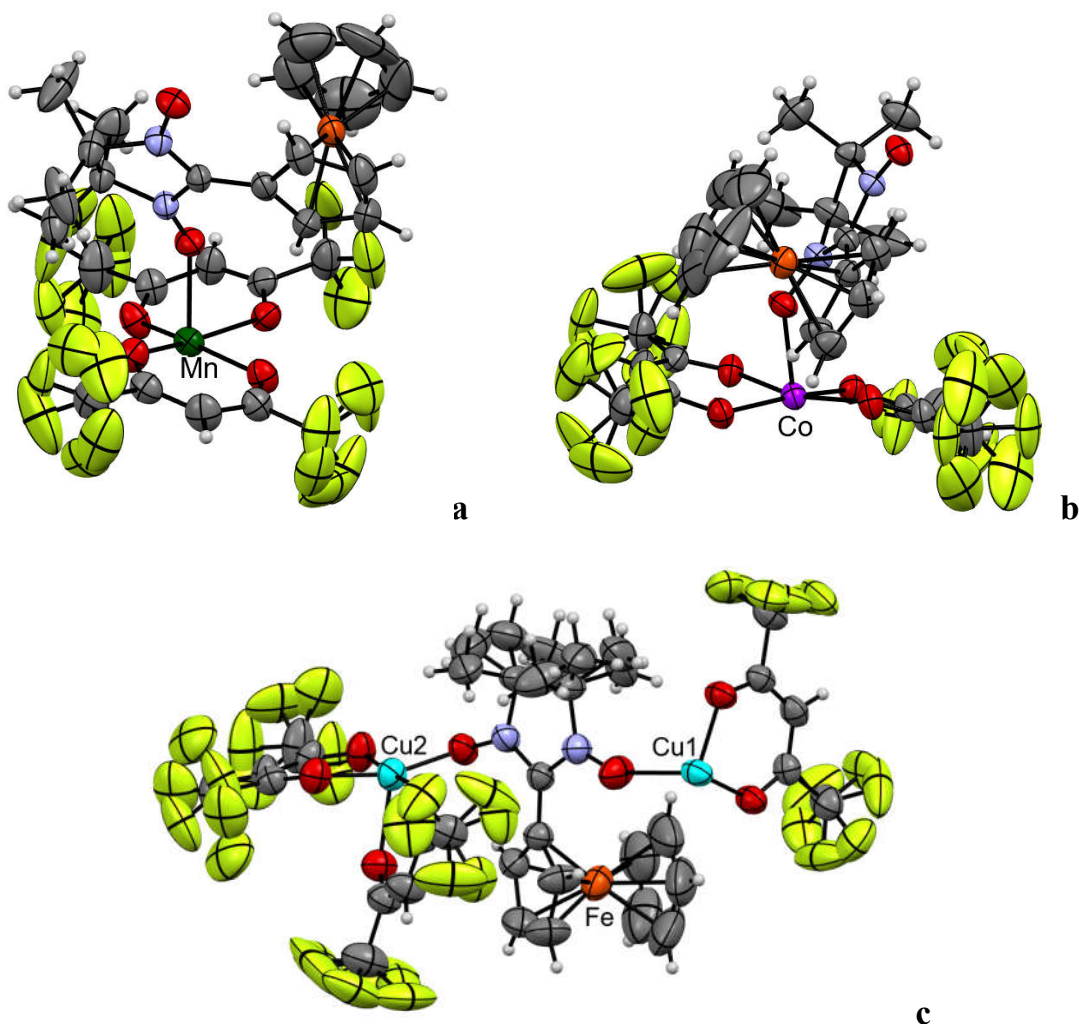

**Figure S1-1.** Crystallographically independent parts of chains [Mn(hfac)<sub>2</sub>L]<sub>n</sub> (a), [Co(hfac)<sub>2</sub>L]<sub>n</sub> (b) and molecule {[Cu(hfac)<sub>2</sub>]<sub>3</sub>L<sub>2</sub>} (c). Colour legend: N – blue, O – red, H – white, C – grey, F – green, Cu – cyan, Fe – dark orange, Mn – green, Co – violet. Principle ellipsoids for non-hydrogen atoms are given with 50% probability level.

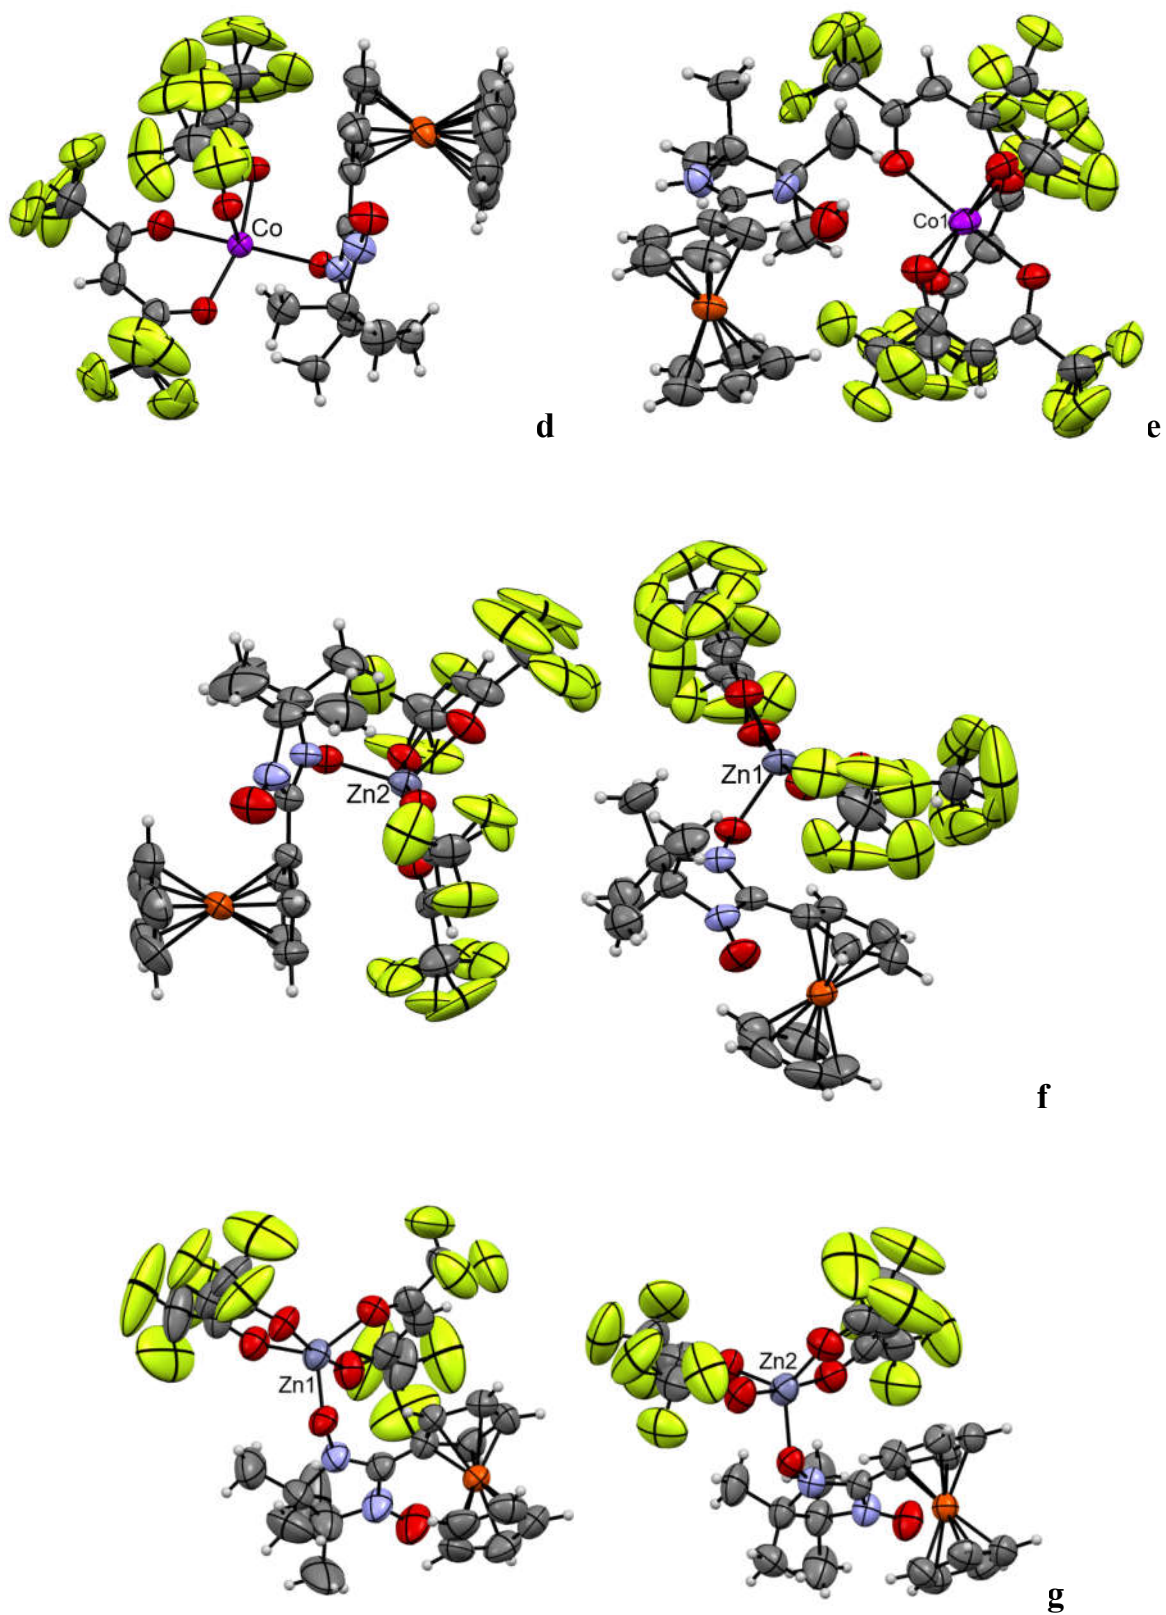

**Figure S1-2.** Crystallographically independent parts of  $\{L[Co(hfac)_2]_2L^*\}$  (d) and  $H_2L[Co(hfac)_3]$  (e), structure of molecules in  $[Zn(hfac)_2L]$  (f) and  $[Zn(hfac)_2L] \cdot 0.25C_6H_{14}$  (g). *Colour legend:* N – blue, O – red, H – white, C – grey, F – green, Fe – dark orange, Co – violet, Zn – smoky. Principle ellipsoids for non-hydrogen atoms are given with 50% probability level.

## 5. Crystal structure of binuclear $\{L[Co(hfac)_2]_2L^*\}$ and complex salt $H_2L'[Co(hfac)_3]$

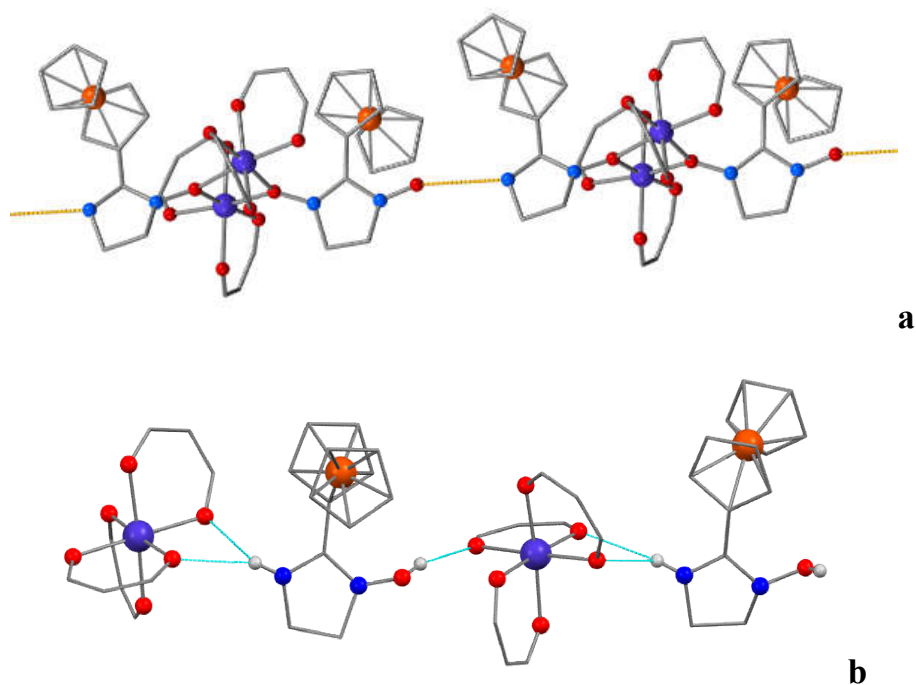

**Figure S2.** Short intermolecular contacts in crystal structures of  $\{L[Co(hfac)_2]_2L^*\}$  (a) and  $H_2L'[Co(hfac)_3]$  (b). *Colour legend:* N – blue, O – red, Fe – dark orange, Co – violet, carbon skeleton – grey; H atoms,  $CH_3$ - and  $CF_3$ -groups are omitted for clarity; short contacts  $O_{NO}\dots N$  in  $\{L[Co(hfac)_2]_2L^*\}$  are highlighted in yellow (a), H-bonds in  $H_2L'[Co(hfac)_3]$  are coloured in cyan (b).

In the reaction of L with  $Co(hfac)_2 \cdot xH_2O$  along with the chain-polymer complex  $[Co(hfac)_2L]_n$ , the formation of binuclear  $\{L[Co(hfac)_2]_2L^*\}$  and complex salt  $H_2L'[Co(hfac)_3]$  were observed (Fig. S2).

According to SC XRD data, the molecule of the binuclear  $\{L[Co(hfac)_2]_2L^*\}$  complex is centrosymmetric and in the crystal structure the superposition of nitronyl and imino nitroxides is observed (Fig. S2a). Uncoordinated  $O_{NO}$  atom of the paramagnetic ligand occupies the position with the weight  $\frac{1}{2}$  in the centrosymmetric molecule. In  $\{L[Co(hfac)_2]_2L^*\}$  two  $O_{NO}$  atoms of the paramagnetic ligands L and  $L^*$  act as bridges, linking two  $Co(hfac)_2$  fragments with *cis*-coordinated hfac ligands. In this case, the  $Co-O_{NO}$  bonds and corresponding  $\angle CoO_{NO}N$  angles are different (2.095(2) and 2.184(2) Å and 119.9(1) and 134.9(1)°, respectively). The  $N-O_{Co}$  bond length is equal to 1.349(2) Å and is typical for this kind of bridging coordination of the nitroxide group (average 1.35(2) Å).<sup>1</sup> Nitronyl nitroxide fragment and the associated Cp ring in the paramagnetic ligands are non-coplanar; their planes are rotated at an angle of 19.1°. There are some short  $O_{NO}\dots N$  contacts between neighboring molecules of the complexes (3.172(5) Å).

$Co-O$  distances in the  $[Co(hfac)_3]^-$  complex anion of  $H_2L'[Co(hfac)_3]$  consist of 2.052(3)-2.081(3) Å are indicative of  $Co^{2+}$  charge state. Thus, ferrocenyl derivative remains in

its protonated state  $\text{H}_2\text{L}^+$ . Fe- $\text{C}_{\text{CP}}$  distances in  $\text{H}_2\text{L}^+$  are typical for the discussed series of compounds (Table S2). While N-O bond length in  $\text{H}_2\text{L}^+$  (1.368(4) Å) is substantially longer than the one in nitronyl nitroxide L (~1.32 Å). It should be noted, that NOH-group in  $\text{H}_2\text{L}^+$  is remarkably out of  $\{\text{CN}_2\}$  plane, which is common for diamagnetic hydroxylamines. Bond lengths C-N are nearly equal (1.317(5)-1.328(6)) in the  $\{\text{CN}_2\text{O}\}$  fragment due to conjugation effect. Hydrogen atoms of  $\text{H}_2\text{L}^+$  form hydrogen bonds to  $\text{O}_{\text{hfac}}$  atoms linking ions into ribbons (Fig. S2b).

## 6. Comparison of *trans*- and *cis*-chains

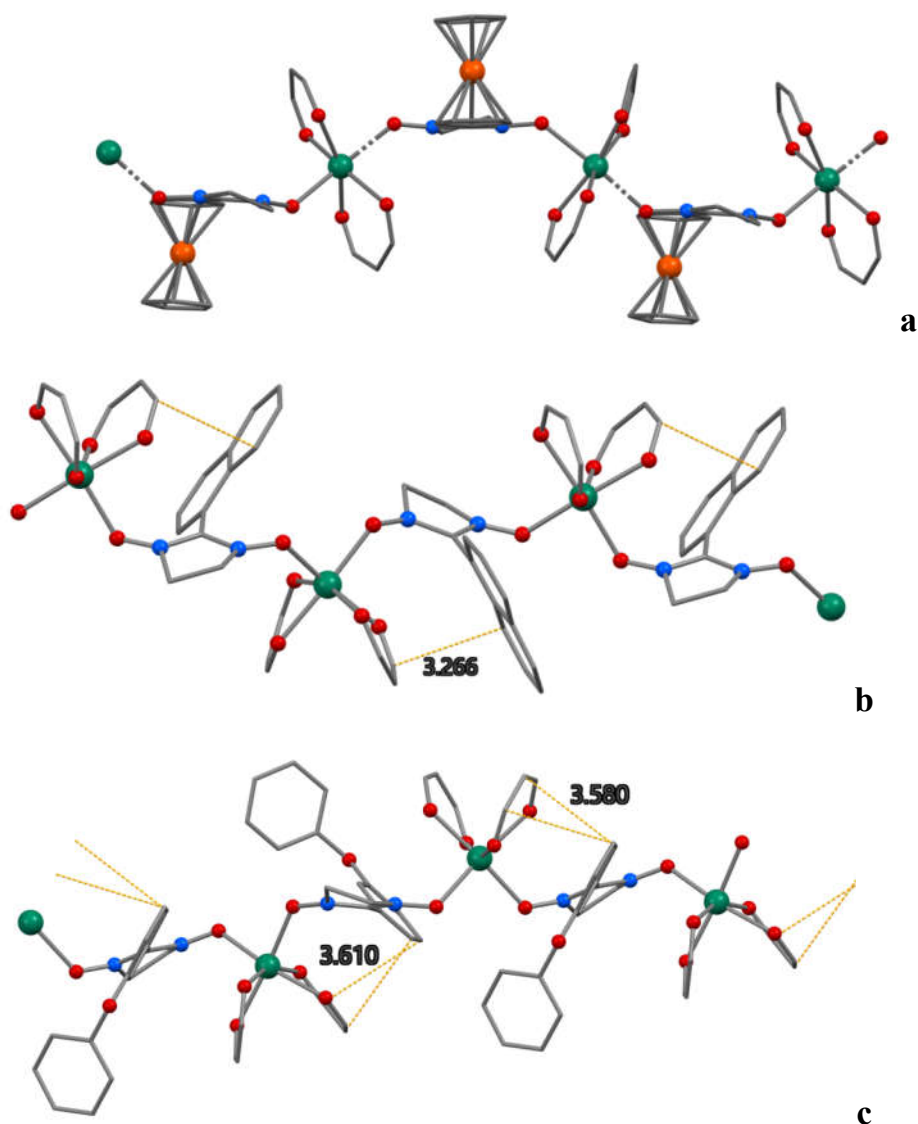

**Figure S3.** Fragments of chains in *trans*- $[\text{Mn}(\text{hfac})_2\text{L}]_n$  (a), *cis*- $[\text{Mn}(\text{hfac})_2(\text{NN-Naph})]_n$  (b),<sup>2</sup> and *cis*- $[\text{Mn}(\text{hfac})_2(\text{NN-Ph}_3\text{OPh})]_n$  (c).<sup>3</sup> Colour legend: N – blue, O – red, Fe – dark orange, Mn – green, carbon skeleton – grey; H atoms,  $\text{CH}_3$ - and  $\text{CF}_3$ -groups are omitted for clarity; intrachain contacts  $\text{C}\cdots\text{C}$  are shown in yellow.

## 7. Powder X-ray Diffraction patterns

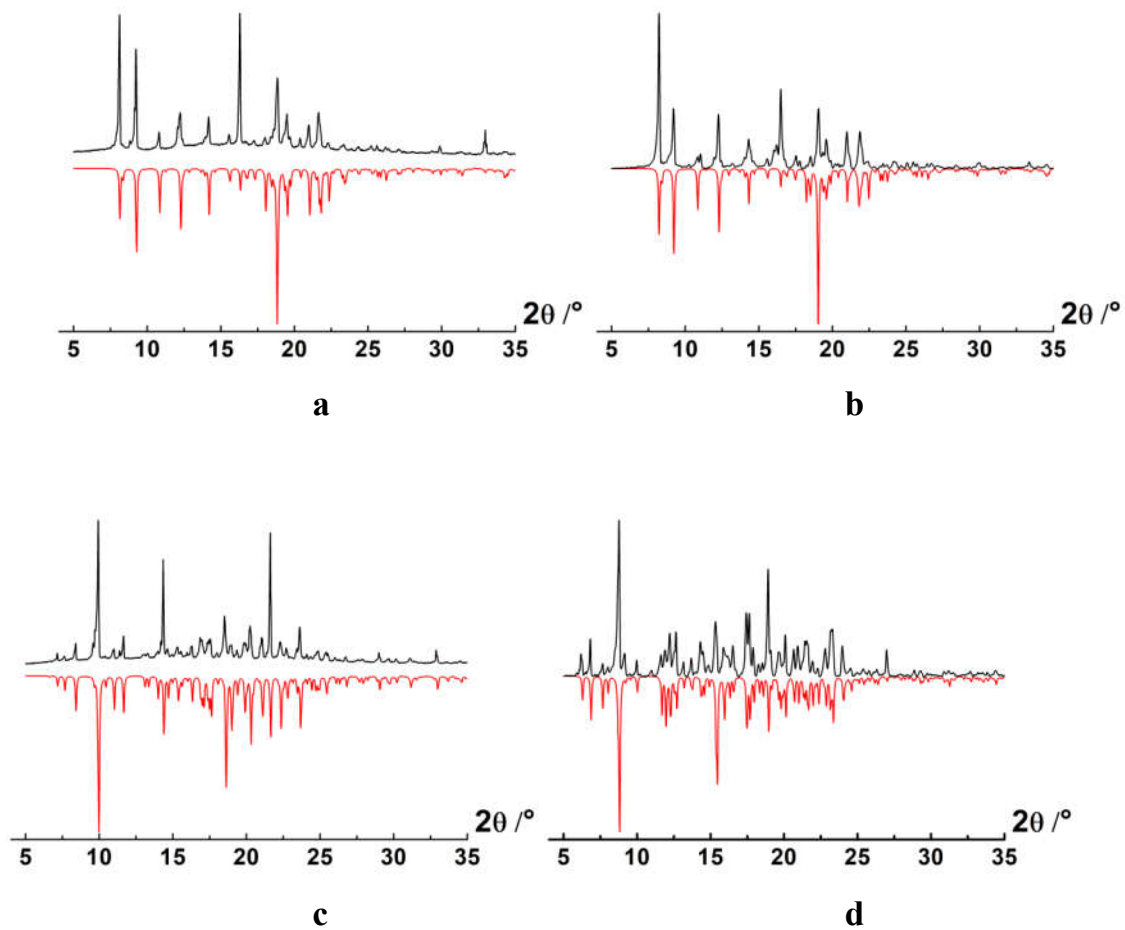

**Figure S4.** Comparison of the experimental powder diffraction pattern (black lines) with that simulated from the single crystal structure (red lines) of  $[\text{Mn}(\text{hfac})_2\text{L}]_n$  (a),  $[\text{Co}(\text{hfac})_2\text{L}]_n$  (b),  $\{[\text{Cu}(\text{hfac})_2]_3\text{L}_2\}$  (c), and  $[\text{Zn}(\text{hfac})_2\text{L}]$  (d) at 296 K.



## 8. Magnetic susceptibility measurements

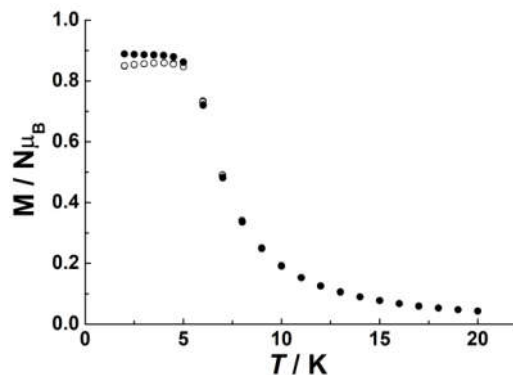

**Figure S5.** Zero field cooled (○) and field cooled (●) magnetization at 150 Oe for  $[\text{Mn}(\text{hfac})_2\text{L}]_n$  complex.

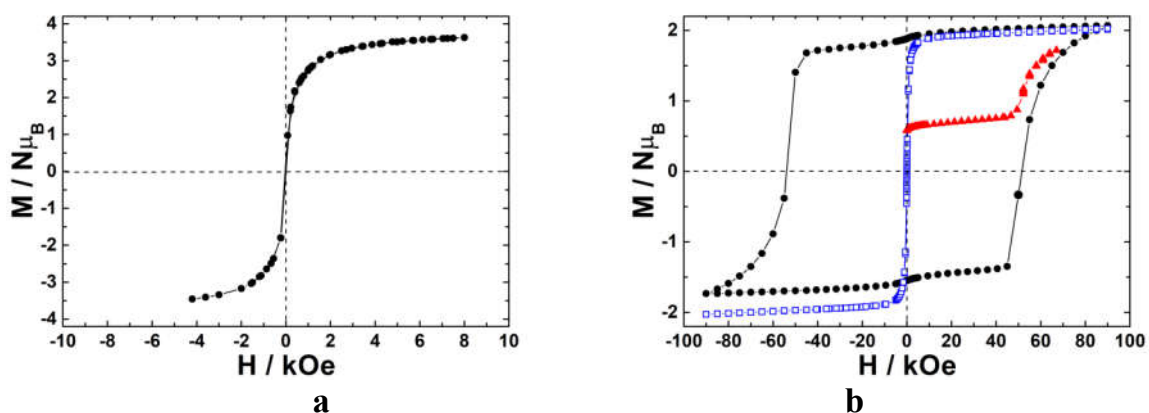

**Figure S6.** Field dependences of magnetization for  $[\text{Mn}(\text{hfac})_2\text{L}]_n$  (a: -●- at 2 K, solid line only guide) and for  $[\text{Co}(\text{hfac})_2\text{L}]_n$  (b: -▲- initial magnetization curve from 0 to 67.0 kOe at 2 K, -●- hysteresis loop from -90.0 to 90.0 kOe at 2 K, and -□- magnetization curve from -90.0 to 90.0 kOe at 20 K; solid lines only guide).

In the case of the chain-polymer complex  $[\text{Mn}(\text{hfac})_2\text{L}]_n$ , there is no hysteresis in the field dependences of the magnetization curves, and the initial magnetization curve coincides with the subsequent ones (Fig. 6a, black circles). The magnetization of  $[\text{Co}(\text{hfac})_2\text{L}]_n$  at 2 K increases stepwise to  $\sim 0.65 N\mu_B$  in the low magnetic field region, then gradually increases to  $\sim 0.77 N\mu_B$  when the magnetic field is increased to 45 kOe. Above 45 kOe, the magnetization increases more sharply (Fig. 6b, red triangles), but saturation cannot be achieved on MPMSXL and PPMS systems  $H_{\text{MPMS}}^{\text{max}} = 70$  kOe and  $H_{\text{PPMS}}^{\text{max}} = 90$  kOe). Therefore, hysteresis curves were measured on the PPMS device (Fig. 6b, black circles) by achieving full saturation of  $\sim 2.0 N\mu_B$  at 20 K (Fig. 6b, empty blue squares) and then lowering the temperature to 2 K while maintaining the field value at 90 kOe.

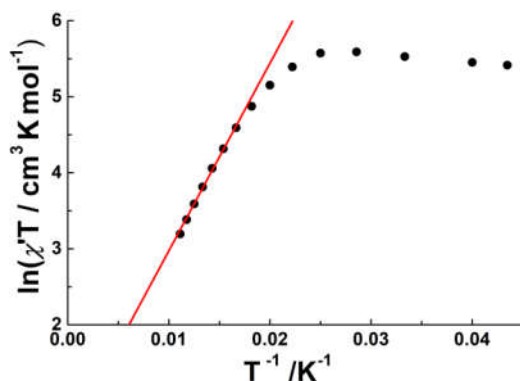

**Figure S7.**  $\ln(\chi'T)$  vs.  $1/T$  for  $[\text{Co}(\text{hfac})_2\text{L}]_n$  under zero DC field (solid red line corresponds to a linear fitting).

For Ising one-dimensional ordered spin systems, the value of  $\chi'T$ , where  $\chi'$  is the real part of the magnetic susceptibility, increases exponentially as the temperature decreases, according to the expression  $\chi'T = C_{\text{eff}} \exp[\Delta_\xi / (k_B \cdot T)]$ , where  $C_{\text{eff}}$  is the effective Curie constant of the repeating fragment ( $C_{\text{eff}} = 1$  for  $S_{\text{eff}} = 1$ ), and  $\Delta_\xi$  is the energy required to create a domain wall within the chain, reflecting the degree of correlation between spins.<sup>4</sup> The susceptibility was measured in a magnetic field with amplitude of 3.5 Oe, oscillating at a frequency of 1.0 Hz, in the absence of DC magnetic field in the temperature range of 2-90 K. The linear dependence of  $\ln(\chi'T)$  in coordinates  $\ln(\chi'T)$  vs.  $1/T$  in the range of 60-90 K confirms the one-dimensional ordering in  $[\text{Co}(\text{hfac})_2\text{L}]_n$ , and the optimal parameters for the linear approximation of the data were:  $\Delta_\xi = 171(4) \text{ cm}^{-1}$ ,  $C_{\text{eff}} = 1.66(14) \text{ cm}^3 \text{ K} \cdot \text{mol}^{-1}$ . At temperatures below 40 K, the curve saturates, which is characteristic of the presence of defects (finite-size effect). The strong correlation between spins in the chain suggests that  $[\text{Co}(\text{hfac})_2\text{L}]_n$  is a single-chain magnet with a high energy barrier for magnetization reversal.

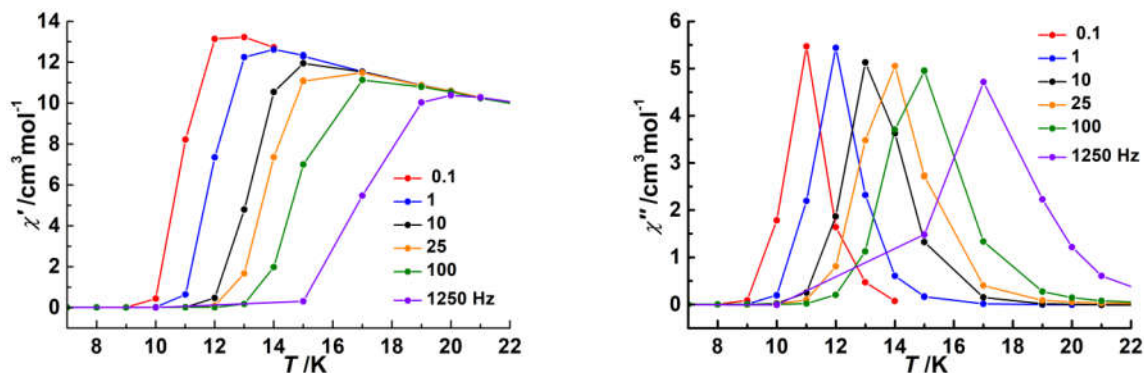

**Figure S8.** Temperature dependencies of  $\chi'$  (in-phase) and  $\chi''$  (out-of-phase) components of the AC magnetic susceptibility for  $[\text{Co}(\text{hfac})_2\text{L}]_n$  (under zero DC field with the ac field of 3.5 Oe and the frequency varies in range 0.01–1488 Hz; solid lines only guide).

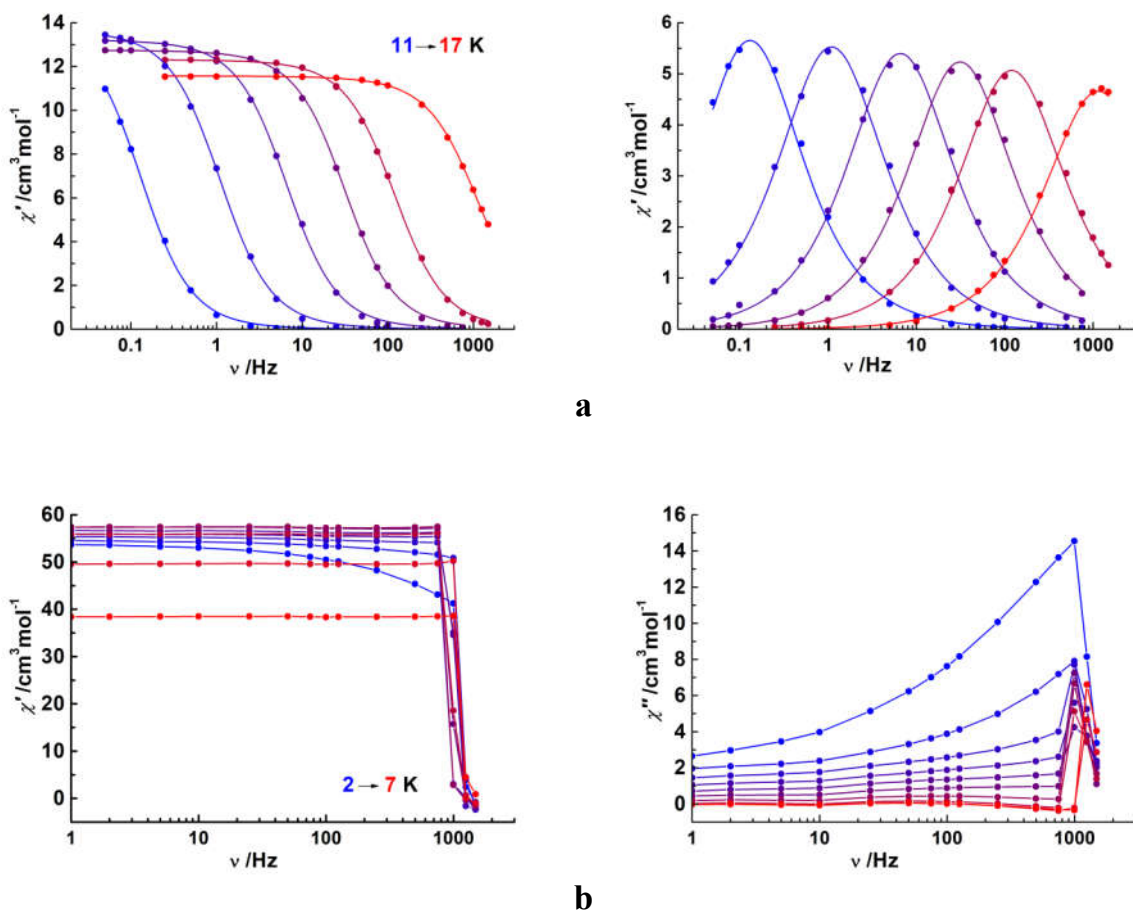

**Figure S9.** Frequency dependencies of  $\chi'$  (in-phase) and  $\chi''$  (out-of-phase) components of the AC magnetic susceptibility (under zero DC field with the ac field of 3.5 Oe and the frequency varies in range 0.01–1488 Hz) at different temperatures for [Co(hfac)<sub>2</sub>L]<sub>n</sub> (a, the solid lines represent fitting using a single generalized Debye model) and [Mn(hfac)<sub>2</sub>L]<sub>n</sub> (b, solid lines only guide).

## Magnetic modeling

Experimental curve  $\chi T(T)$  for  $[\text{Co}(\text{hfac})_2\text{L}]_n$  was fitted using the branch chain model with the following spin Hamiltonian:

$$\hat{H} = \sum\{-2J[S_{\text{Co},i(z)}(S_{R,i(z)} + S_{R,i-1(z)})] + J_a L_{\text{Co},i(z)} S_{\text{Co},i(z)} + DL_{\text{Co},i(z)}^2 - \mu_B H(g_{\text{Co}} S_{\text{Co},i(z)} + g_{\text{R}} S_{R,i(z)} + kL_{\text{Co},i(z)})\},$$

where  $J$  – intrachain exchange parameter;  $g_{\text{R}} = 2$  (fixed),  $g_{\text{Co}}$  –  $g$ -factors of the radical and  $\text{Co}^{2+}$  ion;  $D$  – single-ion anisotropy parameter of  $\text{Co}^{2+}$  and  $k$  – orbital reduction factor.<sup>5</sup>

The fitting was performed using the following equation:

$$\chi T = \frac{N\mu_B^2}{k_B} \frac{[u^2 a + 2uc + \frac{(ua+c)^2}{b} + d]}{a + b}$$

$$a = [2e^z \cosh(3y) + 1] \cosh(6x) + [2e^z \cosh(y) + 1] \cosh(2x)$$

$$b = 2[e^z (\cosh(3y) + \cosh(y) + 1)]$$

$$c = \{e^z [e^{-3y}(3v - k) + e^{3y}(3v + k)] + 3v\} \sinh(6x) \\ + \{e^z [e^{-y}(v - k) + e^{-y}(v + k)] + v\} \sinh(2x)$$

$$d = \{e^z [e^{-3y}(3v - k)^2 + e^{3y}(3v + k)^2] + (3v)^2\} (1 + \cosh(6x)) \\ + \{e^z [e^{-y}(v - k)^2 + e^y(v + k)^2] + v^2\} (1 + \cosh(2x))$$

$$u = \frac{g_{\text{R}}}{2}; v = \frac{g_{\text{Co}}}{2}$$

$$x = \frac{J}{2k_B T}; y = \frac{-J_a}{2k_B T}; z = \frac{-D}{k_B T}$$

Frequency dependences of the in-phase ( $\chi'$ ) and out-of-phase ( $\chi''$ ) AC magnetic susceptibilities were analyzed using the generalized Debye model:

$$\chi'(\omega) = \chi_S + (\chi_T - \chi_S) \frac{1 + (\omega\tau)^{1-\alpha} \sin\left(\frac{\pi\alpha}{2}\right)}{1 + 2(\omega\tau)^{1-\alpha} \sin\left(\frac{\pi\alpha}{2}\right) + (\omega\tau)^{2-2\alpha}}$$

$$\chi''(\omega) = \chi_T - \chi_S \frac{(\omega\tau)^{1-\alpha} \cos\left(\frac{\pi\alpha}{2}\right)}{1 + 2(\omega\tau)^{1-\alpha} \sin\left(\frac{\pi\alpha}{2}\right) + (\omega\tau)^{2-2\alpha}}$$

where  $\chi_T$  – adiabatic susceptibility,  $\chi_S$  – isothermal susceptibility,  $\tau$  – relaxation time and  $\alpha$  – parameter that describes width of a relaxation time distribution.

## 9. Quantum chemical calculations

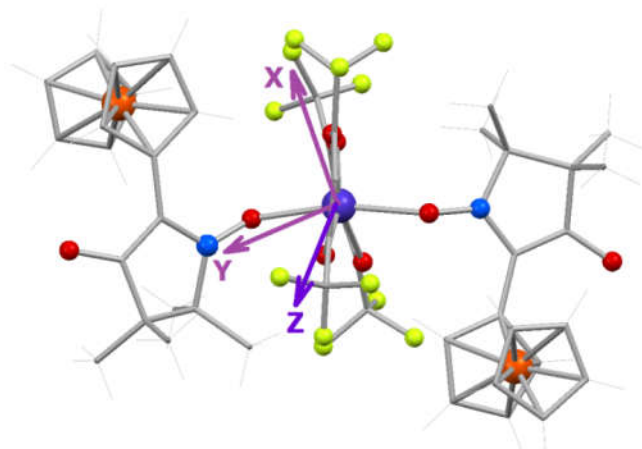

**Figure S10.** Isolated  $L^d\text{-Co-L}^d$  fragment with two diamagnetic ligands  $L^d$  (Scheme 1S) being used to evaluate  $D$ -tensor by *ab initio* CASSCF quantum chemical calculations. Directions of the  $D$ -tensor main axes are shown by the corresponding arrows. The calculated values of the  $D$ -tensor are  $D = -116\text{ cm}^{-1}$  and  $E/D = 0.21$ .

Table 3 shows the energies of the six lower Kramers doublets for the  $L^d\text{-Co-L}^d$  complex, calculated using CASSCF(7.5). According to these calculations, the description of the magnetic properties of the  $L^d\text{-Co-L}^d$  complex up to temperatures  $T$  of about 250 K can be limited by two lower doublets (and then the  $D$ -tensor approximation can be used).

**Table S3.** Energies of the six lower Kramers doublets for the  $L^d\text{-Co-L}^d$

| Kramers doublet number                    | 0    | 1   | 2   | 3   | 4    | 5    |
|-------------------------------------------|------|-----|-----|-----|------|------|
| Kramers doublet energy / $\text{cm}^{-1}$ | 0.00 | 248 | 598 | 945 | 1794 | 1918 |

## 10. References

- 1 C. R. Groom, I. J. Bruno, M. P. Lightfoot and S. C. Ward, The Cambridge Structural Database, *Acta Crystallogr. Sect. B Struct. Sci. Cryst. Eng. Mater.*, 2016, **72**, 171–179.
- 2 R. A. A. Cassaro, S. G. Reis, T. S. Araujo, P. M. Lahti, M. A. Novak and M. G. F. Vaz, A Single-Chain Magnet with a Very High Blocking Temperature and a Strong Coercive Field, *Inorg. Chem.*, 2015, **54**, 9381–9383.
- 3 X. Y. Qin, G. Xiong, D. Liao, Y. Ma, P. Gao, X. L. Sun and P. Liu, Synthesis, crystal structure, and magnetism of  $[\text{Mn}(\text{hfac})_2\text{NIT}(\text{Ph-m-OPh})]$ , *J. Coord. Chem.*, 2012, **65**, 2683–2691.
- 4 B. Sieklucka and D. Pinkowicz, *Molecular Magnetic Materials: Concepts and Applications*, John Wiley and Sons, Weinheim, Germany, 2017.
- 5 P. J. Van Koningsbruggen, O. Kahn, K. Nakatani, Y. Pei, J. P. Renard, M. Drillon and P. Legoll, Magnetism of A-copper(II) bimetallic chain compounds (A = iron, cobalt, nickel): one- and three-dimensional behaviors, *Inorg. Chem.*, 1990, **29**, 3325–3331.
